# Supplementary material for: Sld3CBD–Cdc45 structural insights into Cdc45 recruitment for CMG complex formation during DNA replication
Source: eLife journal article supplement (doi:10.7554/elife.101717), 2024-11-07
Supplement: fig4-figsupp3-data1 [file elife-101717-fig4-figsupp3-data1-v1.pdf]

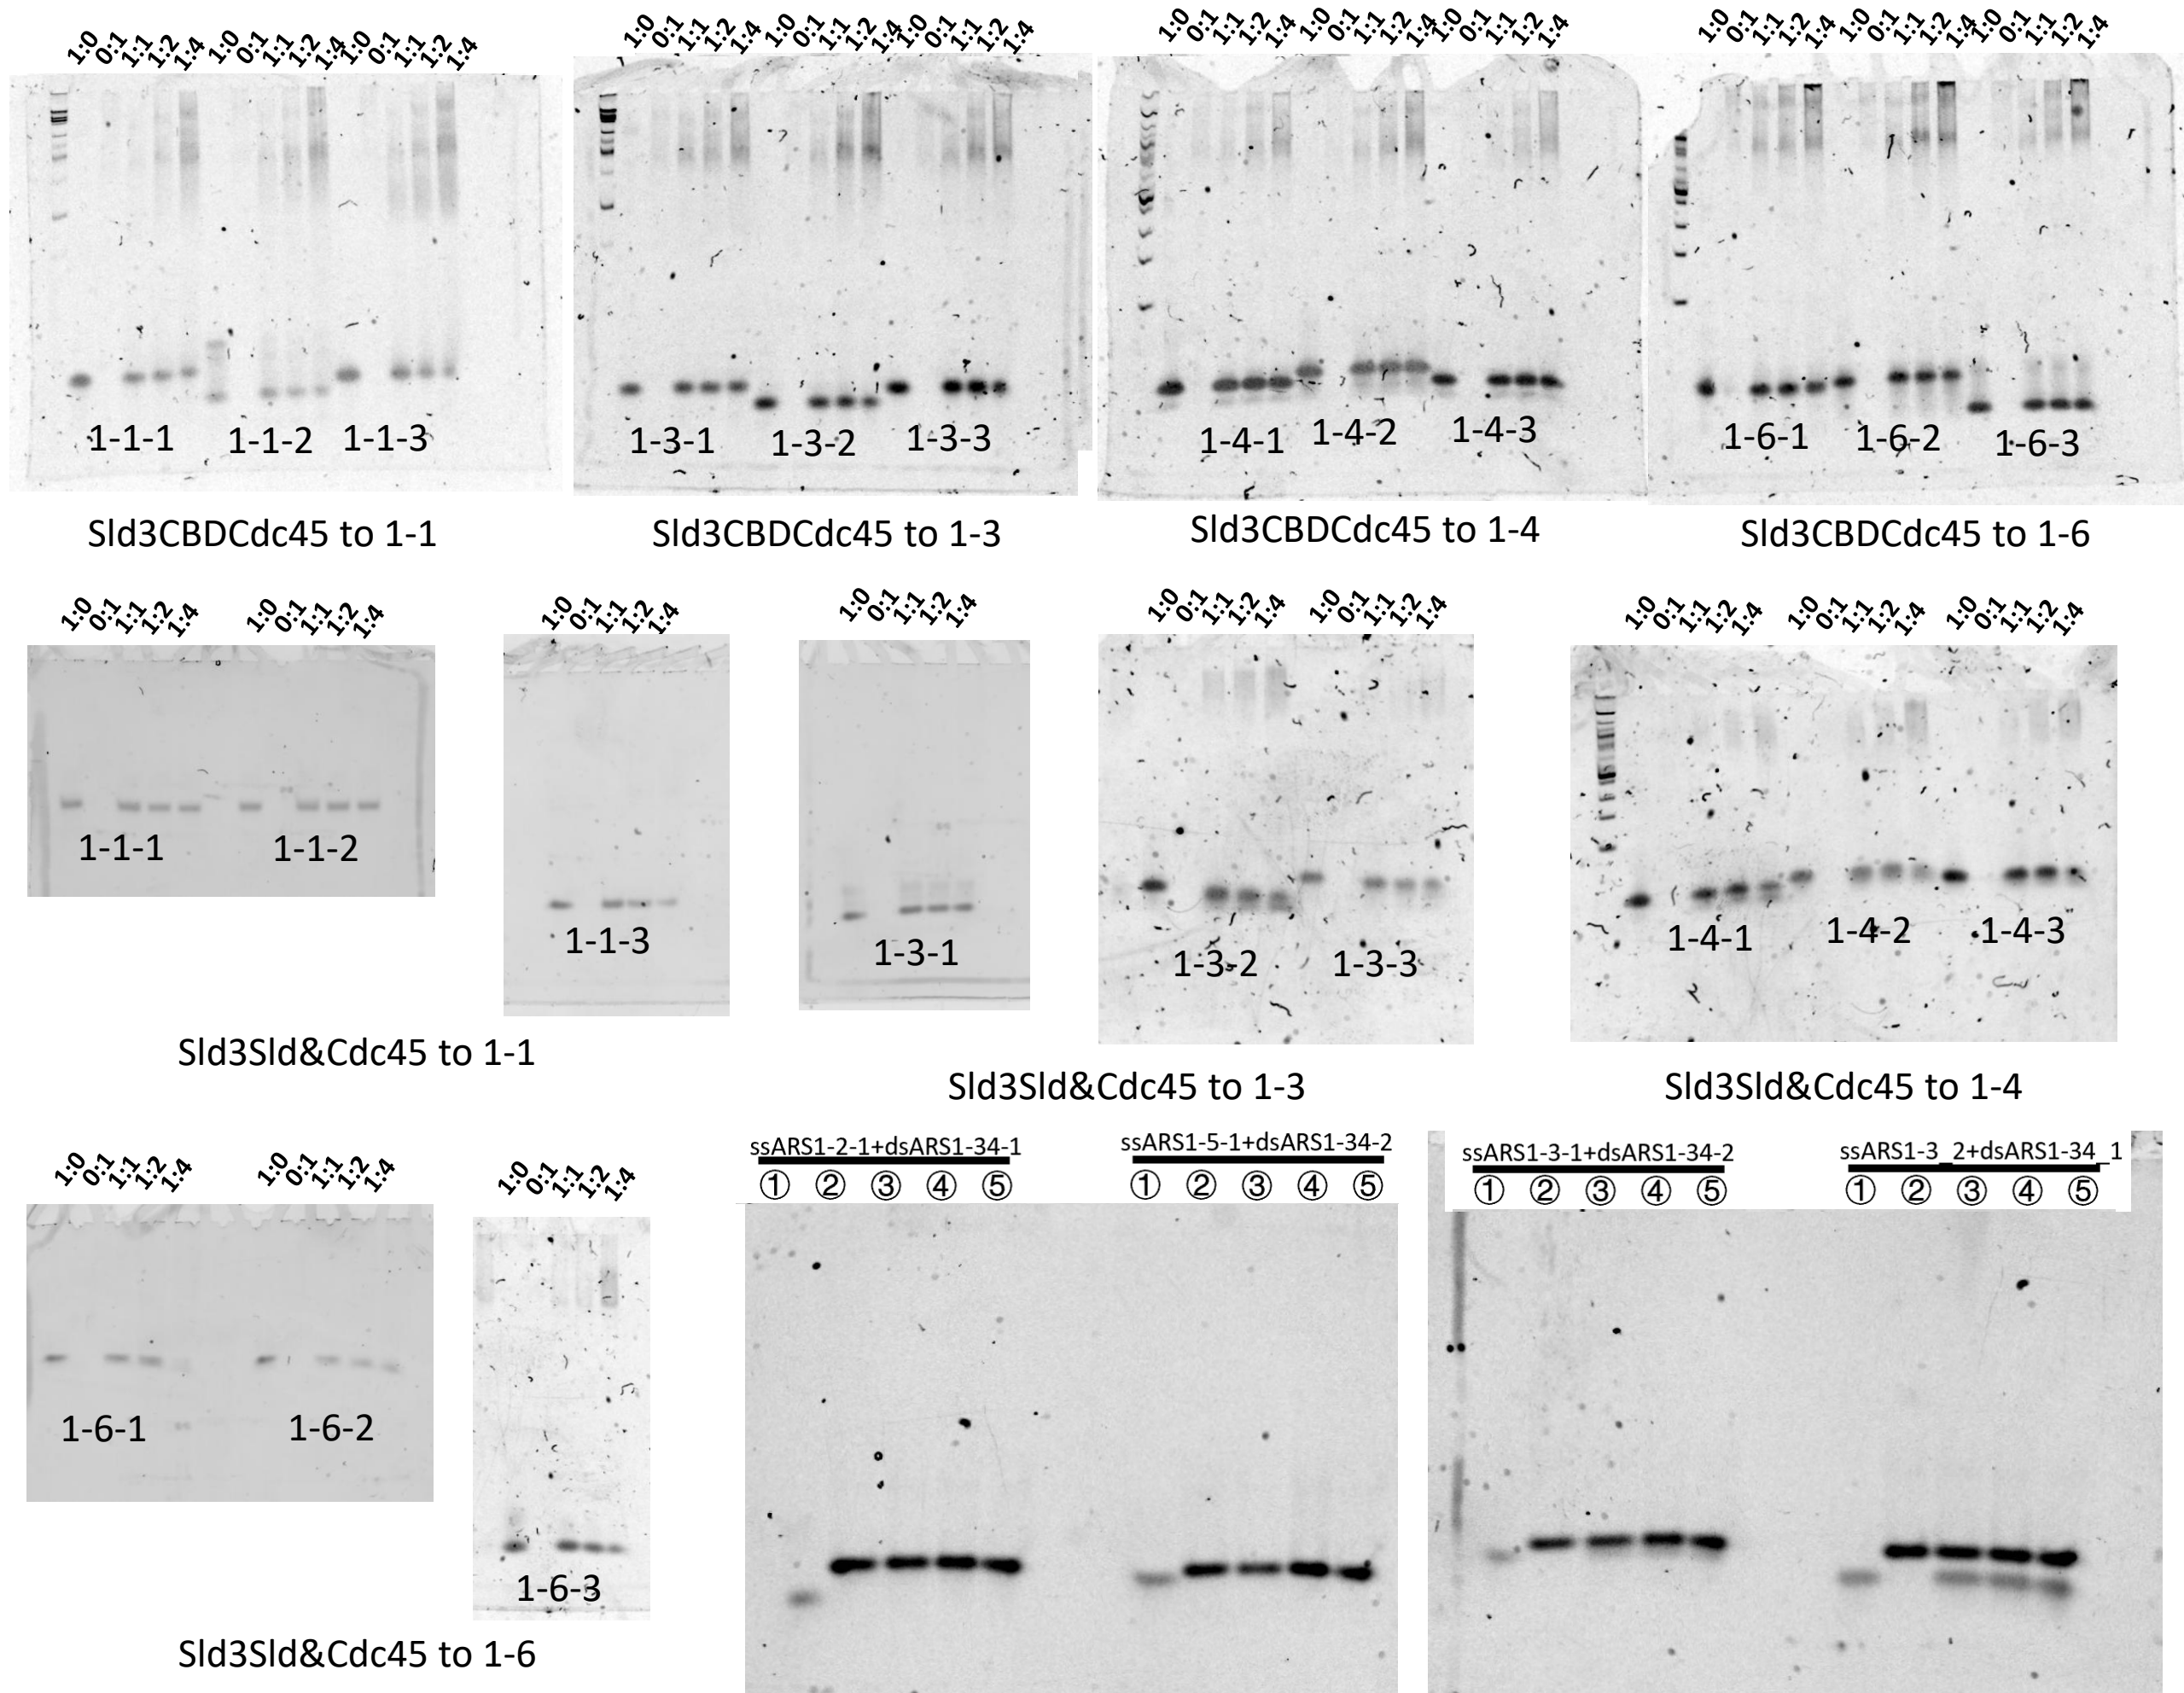

Figure 4-figure supplement 3, Source Data 1. Original native-PAGE corresponding to Figure 4-figure supplement 3. ssDNA was stained with SYBR safe. Due to replacement of imaging equipment, the images exhibit certain background differences, which do not affect the experimental conclusions.
